# Supplementary material for: Deformed Epidermal Autoregulatory Factor-1 (DEAF1) Interacts with the Ku70 Subunit of the DNA-Dependent Protein Kinase Complex
Source: PubMed Central journal article supplement (PMC3307728; doi:10.1371/journal.pone.0033404), 2012-03-19
Supplement: pone.0033404.s001.pdf [file pone.0033404.s001.pdf]

Supplemental Data to “Deformed Epidermal Autoregulatory Factor-1 (DEAF1)  
Interacts with the Ku70 Subunit of the DNA-Dependent Protein Kinase Complex”  
by Philip J. Jensik, Jodi I. Huggenvik and Michael W. Collard

ProFound search results using mass spectrometry peptide masses from the 70 &  
80 kDa proteins that interact with DEAF1 and are identified as Ku70 and Ku80.

**ProFound** - Search Result DetailsVersion 4.10.5  
The Rockefeller University Edition

Details for rank 1 candidate in search BD96F7CA-02B8-7AC327BA

gi|4503841|ref|NP\_001460.1| thyroid autoantigen 70kDa (Ku antigen); thyroid autoantigen 70kD (Ku antigen) [Homo sapiens]

gi|125729|sp|P12956|KU70\_HUMAN ATP-dependent DNA helicase II, 70 kDa subunit (Lupus Ku autoantigen protein p70) (Ku70) (70 kDa subunit of Ku antigen) (Thyroid-lupus autoantigen) (TLAA) (CTC box binding factor 75 kDa subunit) (CTCBF) (CTC75)

gi|105163|pir||A30894 70K thyroid autoantigen - human

gi|15825664|pdb|1JEQ|A Chain A, Crystal Structure Of The Ku Heterodimer

gi|15825716|pdb|1JEY|A Chain A, Crystal Structure Of The Ku Heterodimer Bound To Dna

gi|178650|gb|AAA51733.1| p70 autoantigen

gi|250497|gb|AAB22381.1| Ku autoantigen p70 subunit [Homo sapiens]

gi|307095|gb|AAA36155.1| Ku protein subunit

gi|339667|gb|AAA61177.1| thyroid autoantigen

gi|5327042|emb|CAB46206.1| bK216E10.1 (thyroid autoantigen 70kD (Ku antigen)) [Homo sapiens]

gi|14249924|gb|AAH08343.1|AAH08343 thyroid autoantigen 70kD (Ku antigen) [Homo sapiens]

gi|14603133|gb|AAH10034.1|AAH10034 thyroid autoantigen 70kD (Ku antigen) [Homo sapiens]

gi|15082480|gb|AAH12154.1|AAH12154 Similar to thyroid autoantigen 70kD (Ku antigen) [Homo sapiens]

gi|17390603|gb|AAH18259.1|AAH18259 thyroid autoantigen 70kD (Ku antigen) [Homo sapiens]

Sample ID : RD65, Jensik [Pass:0]  
Measured peptides : 27  
Matched peptides : 11  
Min. sequence coverage: 22%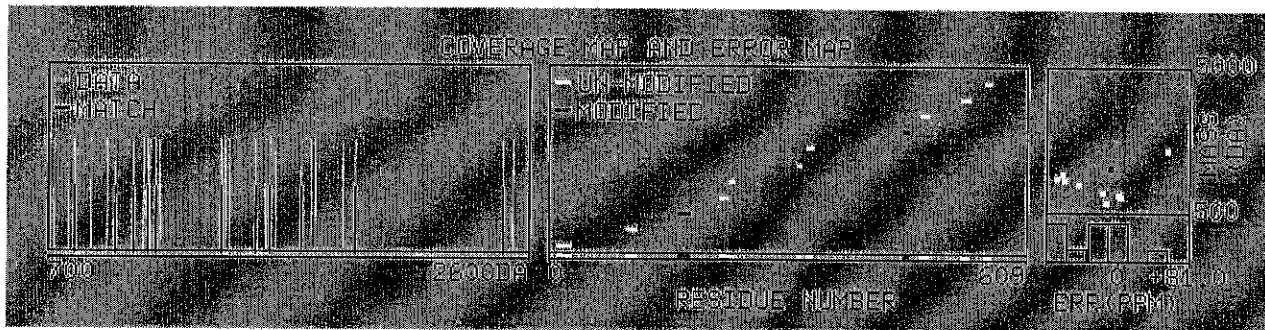

| Measured Mass (M) | Avg/Mono | Computed Mass | Error (ppm) | Residues Start | Residues To | Missed Cut | Peptide sequence             |
|-------------------|----------|---------------|-------------|----------------|-------------|------------|------------------------------|
| 809.393           | M        | 809.403       | -12         | 319            | 325         | 0          | SQIYGSR                      |
| 961.454           | M        | 961.450       | 4           | 231            | 238         | 0          | VHFESSK                      |
| 1032.508          | M        | 1032.508      | 0           | 332            | 339         | 1          | EETEELKR                     |
| 1088.539          | M        | 1088.553      | -13         | 452            | 461         | 0          | IMATPEQVGK<br>(1)+O@M;       |
| 1124.505          | M        | 1124.523      | -16         | 557            | 565         | 0          | VEYSEELK                     |
| 1387.623          | M        | 1387.682      | -43         | 219            | 230         | 0          | DIISIAEEDLR                  |
| 1519.628          | M        | 1519.719      | -60         | 527            | 539         | 0          | ELVYPPDYNPEGK                |
| 1572.707          | M        | 1572.814      | -68         | 101            | 114         | 0          | NIYVLQELDNPGAK               |
| 1702.700          | M        | 1702.806      | -62         | 475            | 488         | 0          | SDSFENPVLQQHFR               |
| 1917.838          | M        | 1917.852      | -7          | 166            | 182         | 0          | IMLFTNEDNPRGNSAK<br>(1)+O@M; |
| 2500.129          | M        | 2499.987      | 57          | 10             | 31          | 0          | TEGDDEAEQEEENLEASGDYK        |

# ProFound - Search Result Details

Version 4.10.5  
The Rockefeller University Edition

Details for rank 1 candidate in search BB62F265-04EC-788F2586

gi|10863945|ref|NP\_066964.1| ATP-dependant DNA helicase II; X-ray repair complementing defective repair in Chinese hamster cells 5 (double-strand-break rejoining; Ku autoantigen, 80kD); X-ray repair, complementing defective, repair in Chinese hamster; DNA repair protein XRCC5 [Homo sapiens]

gi|125731|sp|P13010|KU86\_HUMAN ATP-dependent DNA helicase II, 80 kDa subunit (Lupus Ku autoantigen protein p86) (Ku86) (Ku80) (86 kDa subunit of Ku antigen) (Thyroid-lupus autoantigen) (TLAA) (CTC box binding factor 85 kDa subunit) (CTCBF) (CTC85) (Nuclear factor IV) (DNA-repair protein XRCC5)

gi|88066|pir|A32626 Ku antigen 80K chain - human

gi|307093|gb|AAA59475.1| Ku antigen

gi|307094|gb|AAA36154.1| Ku (p70/p80) subunit

gi|17512093|gb|AAH19027.1|AAH19027 X-ray repair complementing defective repair in Chinese hamster cells 5 (double-strand-break rejoining; Ku autoantigen, 80kD) [Homo sapiens]

Sample ID : RD76 [Pass:0]  
Measured peptides : 47  
Matched peptides : 21  
Min. sequence coverage: 29%

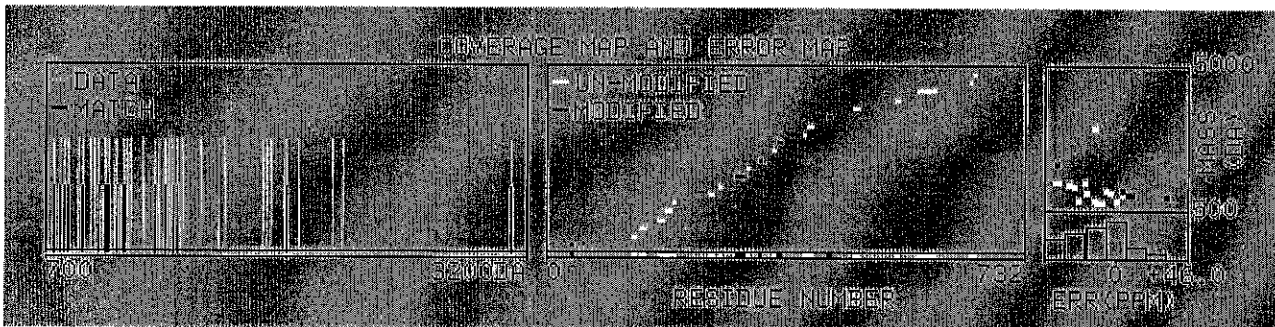

| Measured Mass (M) | Avg/Mono | Computed Mass | Error (ppm) | Residues Start | Residues To | Missed Cut | Peptide sequence                 |
|-------------------|----------|---------------|-------------|----------------|-------------|------------|----------------------------------|
| 703.352           | M        | 703.361       | -13         | 348            | 353         | 0          | SSQVQR                           |
| 744.406           | M        | 744.413       | -9          | 266            | 271         | 0          | SILQER                           |
| 781.401           | M        | 781.412       | -14         | 655            | 660         | 0          | FNNFLK                           |
| 794.356           | M        | 794.355       | 1           | 649            | 654         | 0          | FSEEQR                           |
| 802.399           | M        | 802.418       | -23         | 196            | 202         | 0          | GITEQQK                          |
| 814.397           | M        | 814.397       | 0           | 395            | 400         | 1          | YAYDKR                           |
| 893.408           | M        | 893.379       | 32          | 326            | 332         | 0          | VDEEQMK<br>(1)+O@M;              |
| 976.501           | M        | 976.497       | 4           | 308            | 315         | 0          | EDIQGF                           |
| 1008.549          | M        | 1008.542      | 7           | 37             | 44          | 0          | VITMVFQR<br>(1)+O@M;             |
| 1018.490          | M        | 1018.479      | 11          | 432            | 439         | 0          | QYMFSSLK<br>(1)+O@M;             |
| 1030.603          | M        | 1030.606      | -3          | 535            | 543         | 0          | TLFPLIEAK                        |
| 1072.603          | M        | 1072.623      | -19         | 251            | 260         | 0          | LTIGSNLSIR                       |
| 1098.557          | M        | 1098.553      | 4           | 355            | 363         | 0          | FFMGNQVLK<br>(1)+O@M;            |
| 1108.596          | M        | 1108.602      | -6          | 185            | 195         | 0          | LGHGSPFPLK                       |
| 1265.700          | M        | 1265.734      | -26         | 145            | 155         | 0          | SQLDIHSLK                        |
| 1316.632          | M        | 1316.672      | -30         | 131            | 141         | 0          | HIEIFDLSR                        |
| 1363.525          | M        | 1363.575      | -36         | 172            | 184         | 1          | EDGSGDRGDGPF                     |
| 1376.702          | M        | 1376.756      | -39         | 401            | 413         | 0          | ANPQVGVAFPHK                     |
| 1379.653          | M        | 1379.681      | -20         | 470            | 481         | 0          | TDLEDFPTTK                       |
| 1955.791          | M        | 1955.866      | -38         | 292            | 307         | 0          | ETVYCLNDDDETVLK<br>(1)+C3H5ON@C; |
